# Supplementary material for: Saturation vapor pressure characterization of selected low-volatility organic compounds using a residence time chamber
Source: Copernicus journal article supplement (doi:10.5194/acp-23-6863-2023), 2023-06-21
Supplement: Supplementary file 1 [file acp-23-6863-2023-supplement.pdf]

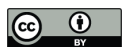

*Supplement of*

## **Saturation vapor pressure characterization of selected low-volatility organic compounds using a residence time chamber**

**Zijun Li et al.**

*Correspondence to:* Zijun Li (zijun.li@qut.edu.au) and Taina Yli-Juuti (taina.yli-juuti@uef.fi)

The copyright of individual parts of the supplement might differ from the article licence.

**Table S1.** Density ( $\rho$ ) for the studied compounds and references for the data.

| Groups              | Compounds       | $\rho$<br>[g cm <sup>-3</sup> ] | Reference                                                       | Reference<br>Temperature<br>[K] |
|---------------------|-----------------|---------------------------------|-----------------------------------------------------------------|---------------------------------|
| Polyethylene glycol | PEG 6           | 1180                            | Krieger et al. (2018)                                           | 298                             |
|                     | PEG 7           | 1206                            | Krieger et al. (2018)                                           | 298                             |
|                     | PEG 8           | 1234                            | Krieger et al. (2018)                                           | 298                             |
|                     | PEG 9           | 1257                            | Extrapolated from the data of PEG3 – 8 in Krieger et al. (2018) | /                               |
| Monocarboxylic acid | Palmitic acid   | 852                             | Sigma Alrich SDS sheet                                          | 298                             |
|                     | Stearic acid    | 941                             | CRC Handbook of Chemistry and Physics (2022)                    | 298                             |
| Dicarboxylic acid   | Azelaic acid    | 1251                            | Thalladi et al. (2000)                                          | 298                             |
|                     | Sebacic acid    | 1210                            | Sigma Alrich SDS sheet                                          | 293                             |
| Alcohol             | meso-Erythritol | 1451                            | CRC Handbook of Chemistry and Physics (2022)                    | 293                             |
|                     | Xylitol         | 1520                            | Sigma Alrich SDS sheet                                          | /                               |
| Ester               | DEHS            | 912                             | Topas GmbH product sheet                                        | /                               |

**Table S2.** Surface tension or energy ( $\sigma$ ) for the studied compounds and references for the data.

| Groups              | Compounds       | $\sigma$<br>[mN m <sup>-1</sup> ] | Reference                                 | Reference<br>Temperature [K] |
|---------------------|-----------------|-----------------------------------|-------------------------------------------|------------------------------|
| Polyethylene glycol | PEG 6           | 45                                | Gallaughier (1932)                        | 298                          |
|                     | PEG 7           | 45                                | Gallaughier (1932)                        | 298                          |
|                     | PEG 8           | 45                                | Gallaughier (1932)                        | 298                          |
|                     | PEG 9           | 45                                | Assumed to be the same as PEG6-8          | /                            |
| Monocarboxylic acid | Palmitic acid   | 130                               | Tao and Mcmurry (2002)                    | 298                          |
|                     | Stearic acid    | 160                               | Tao and Mcmurry (2002)                    | 298                          |
| Dicarboxylic acid   | Azelaic acid    | 180                               | Bilde et al. (2003)                       | 296                          |
|                     | Sebacic acid    | 100                               | Salo et al. (2010)                        | 296                          |
| Alcohol             | meso-Erythritol | 160                               | Emanuelsson et al. (2016)                 | 298                          |
|                     | Xylitol         | 160                               | Assumed to be the same as meso-Erythritol | /                            |
| Ester               | DEHS            | 32                                | Topas GmbH product sheet                  | /                            |

**Table S3.** Summary of experimental melting temperatures from literature.

| Groups                           | Compounds       | Melting Point (K) |       | Reference                      |
|----------------------------------|-----------------|-------------------|-------|--------------------------------|
| Polyethylene glycol              | PEG6            | 281.2 ± 1.0       |       | Krieger et al. (2018)          |
|                                  | PEG7            | 289.2 ± 1.0       |       | Krieger et al. (2018)          |
|                                  | PEG8            | 297.4 ± 1.0       |       | Krieger et al. (2018)          |
|                                  | PEG9            | 299               |       | TCI Chemistry product sheet    |
| Monocarboxylic acid <sup>a</sup> | Palmitic acid   | min               | 332.7 | Zeng et al. (2009)             |
|                                  |                 | max               | 336.5 | Misra et al. (2007)            |
|                                  | Stearic acid    | min               | 326.1 | Eykman (1889)                  |
|                                  |                 | max               | 344.1 | Teixeira et al. (2006)         |
| Dicarboxylic acid <sup>a</sup>   | Azelaic acid    | min               | 379.7 | Khetarpal et al. (1980)        |
|                                  |                 | max               | 380   | Cingolani and Berchiesi (1974) |
|                                  | Sebacic acid    | min               | 403.9 | Roux et al. (2005)             |
|                                  |                 | max               | 407   | Wynberg and Logothetis (1956)  |
| Alcohol <sup>a</sup>             | meso-Erythritol | min               | 381.6 | Spaght et al. (2002)           |
|                                  |                 | max               | 392.2 | Jonsdottir et al. (2002)       |
|                                  | Xylitol         | min               | 365.7 | Barone et al. (1990)           |
|                                  |                 | max               | 369   | Tong et al. (2007)             |
| Ester                            | DEHS            | 225               |       | Topas GmbH product sheet       |

<sup>a</sup>The minimum and maximum experimental melting temperatures were used in the COSMO<sub>therm</sub> calculations.

**Table S4.** Summary of experimental heats of fusion used in the COSMO<sub>therm</sub> calculations

| Groups              | Compounds       | Enthalpy of fusion (kJ mol <sup>-1</sup> ) |        | Reference                   |
|---------------------|-----------------|--------------------------------------------|--------|-----------------------------|
| Monocarboxylic acid | Palmitic acid   | min                                        | 47     | Misra et al. (2007)         |
|                     |                 | max                                        | 54.935 | Pacor (1967)                |
|                     | Stearic acid    | min                                        | 50.93  | Yu et al. (2000)            |
|                     |                 | max                                        | 68.45  | Singleton et al. (1950)     |
| Dicarboxylic acid   | Azelaic acid    | min                                        | 29.7   | Roux et al. (2005)          |
|                     |                 | max                                        | 35.3   | Chen et al. (2009)          |
|                     | Sebacic acid    | min                                        | 40.8   | Domalski and Hearing (1996) |
|                     |                 | max                                        | 46.9   | Ventola et al. (2008)       |
| Alcohol             | meso-Erythritol | min                                        | 38.9   | Lopes Jesus et al. (2005)   |
|                     |                 | max                                        | 42.359 | Spaght et al. (2002)        |
|                     | Xylitol         | min                                        | 33.26  | Tong et al. (2007)          |
|                     |                 | max                                        | 37.7   | Carpentier et al. (2003)    |

**Table S5.** Abbreviations of techniques listed in Tables S6 – S12

| <b>Abbreviations</b> | <b>Full Name</b>                                                                         |
|----------------------|------------------------------------------------------------------------------------------|
| ASAP-MS              | Atmospheric solids analysis probe mass spectrometry                                      |
| EDB                  | Electronic dynamic balance                                                               |
| FT-TDMA              | Flow tube–tandem differential mobility analyzer                                          |
| IVM                  | Integrated volume method                                                                 |
| KE                   | Knudsen effusion                                                                         |
| KEMS                 | Knudsen effusion mass spectrometer                                                       |
| MOVI-CIMS            | Micro-Orifice Volatilization Impactor Coupled to a Chemical Ionization Mass Spectrometer |
| TDPBMS               | Thermal desorption particle beam mass spectrometer                                       |
| TE                   | Torsion effusion                                                                         |
| TPD-PT-RMS           | Temperature-programmed desorption proton-transfer reaction mass spectrometry             |
| V-TDMA               | Volatility tandem differential mobility analyzer                                         |

**Table S6.** Summary of measurements of saturation of vapor pressure ( $p_{\text{sat}}$ ) of polyethylene glycols from previous studies.

| Study                    | Compound          | $p_{\text{sat, ref}}$ (Pa)            | $T_{\text{ref}}$ (K) | $T_{\text{exp}}$ (K) | Techniques             | Sample                                                                 | Uncertainty Type |
|--------------------------|-------------------|---------------------------------------|----------------------|----------------------|------------------------|------------------------------------------------------------------------|------------------|
| Krieger et al.<br>(2018) | PEG 6             | $3.15^{+0.58}_{-0.49} \times 10^{-5}$ | 298.15               | 277 – 323            | EDB<br>FT-TDMA<br>KEMS | injected micron droplets<br>atomized, dried aerosols<br>bulk materials | 95% CI           |
|                          | PEG 7             | $1.38^{+0.47}_{-0.35} \times 10^{-6}$ |                      |                      |                        |                                                                        |                  |
|                          | PEG 8             | $9.2^{+20.4}_{-6.4} \times 10^{-8}$   |                      |                      |                        |                                                                        |                  |
|                          | PEG 9 (predicted) | $3.7^{+4.1}_{-2.0} \times 10^{-9}$    |                      |                      |                        |                                                                        |                  |

Note:  $T_{\text{ref}}$  is the reference temperature for the reported  $p_{\text{sat}}$  value;  $T_{\text{exp}}$  is the experimental temperature; and CI is confidence interval.

**Table S7.** Summary of measurements of saturation of vapor pressure ( $p_{\text{sat}}$ ) of palmitic acid from previous studies.

| Study                            | $p_{\text{sat, ref}}$ (Pa)                                                                      | $T_{\text{ref}}$ (K) | $T_{\text{exp}}$ (K) | Techniques | Sample                                                     | Potential Impact of Solvents | Uncertainty Type |
|----------------------------------|-------------------------------------------------------------------------------------------------|----------------------|----------------------|------------|------------------------------------------------------------|------------------------------|------------------|
| Chattopadhyay and Ziemann (2005) | $2.66 \times 10^{-5}$                                                                           | 298                  | 298 – 413            | TDPBMS     | atomized, dried aerosols                                   | YES                          | NA               |
| Davies and Malpass (1961)        | $1.91 \times 10^{-5}$                                                                           | 298                  | 320 – 333            | KE         | bulk materials                                             | NO                           | NA               |
| Tao and McMurry (2002)           | $1.06^{+0.16}_{-0.16} \times 10^{-5}$                                                           | 298                  | 283 – 323            | V-TDMA     | atomized, dried aerosols                                   | YES                          | NA               |
| Yatavelli and Thornton (2010)    | $6.8^{+1.8}_{-1.8} \times 10^{-7}$                                                              | 298                  | 308 – 363            | MOVI-CIMS  | homogeneous nucleation                                     | NO                           | $1\sigma$        |
| Cappa et al. (2008)              | $1.3^{+0.4}_{-0.4} \times 10^{-7}$<br>$1.4^{+0.6}_{-0.6} \times 10^{-5}$<br>(liquid, predicted) | 298                  | NA                   | TPD-PT-RMS | macroscopic, preheated deposit of atomized, dried aerosols | NO                           | $2\sigma$        |

Note:  $T_{\text{ref}}$  is the reference temperature for the reported  $p_{\text{sat}}$  value;  $T_{\text{exp}}$  is the experimental temperature; and NA is for not available.

**Table S8.** Summary of measurements of saturation of vapor pressure ( $p_{\text{sat}}$ ) of stearic acid from previous studies.

| Study                            | $p_{\text{sat, ref}}$ (Pa)                                                                      | $T_{\text{ref}}$ (K) | $T_{\text{exp}}$ (K) | Techniques | Sample                                                     | Potential Impact of Solvents | Uncertainty Type |
|----------------------------------|-------------------------------------------------------------------------------------------------|----------------------|----------------------|------------|------------------------------------------------------------|------------------------------|------------------|
| Chattopadhyay and Ziemann (2005) | $2.83 \times 10^{-6}$                                                                           | 298                  | 298 – 413            | TDPBMS     | atomized, dried aerosols                                   | YES                          | NA               |
| Davies and Malpass (1961)        | $1.38 \times 10^{-6}$                                                                           | 298                  | 331 – 340            | KE         | bulk materials                                             | NO                           | NA               |
| Tao and McMurry (2002)           | $5.64^{+0.85}_{-0.85} \times 10^{-7}$                                                           | 298                  | 283 – 323            | V-TDMA     | atomized, dried aerosols                                   | YES                          | NA               |
| Cappa et al. (2008)              | $9.5^{+3.5}_{-3.5} \times 10^{-8}$<br>$2.2^{+1.1}_{-1.1} \times 10^{-6}$<br>(liquid, predicted) | 298                  | NA                   | TPD-PT-RMS | macroscopic, preheated deposit of atomized, dried aerosols | NO                           | $2\sigma$        |

Note:  $T_{\text{ref}}$  is the reference temperature for the reported  $p_{\text{sat}}$  value;  $T_{\text{exp}}$  is the experimental temperature; and NA is for not available.

**Table S9.** Summary of measurements of saturation of vapor pressure ( $p_{\text{sat}}$ ) of azelaic acid from previous studies.

| Study                            | $p_{\text{sat, ref}}$ (Pa)                                                       | $T_{\text{ref}}$ (K) | $T_{\text{exp}}$ (K) | Techniques | Sample                                                     | Potential Impact of Solvents | Uncertainty Type           |
|----------------------------------|----------------------------------------------------------------------------------|----------------------|----------------------|------------|------------------------------------------------------------|------------------------------|----------------------------|
| Salo et al. (2010)               | $4.7^{+0.8}_{-0.8} \times 10^{-5}$                                               | 298                  | 298 – 573            | V-TDMA     | atomized, dried aerosols                                   | YES                          | 95% CI                     |
| Oxford et al. (2019)             | $2.2 \times 10^{-5}$                                                             | 298                  | 293 – 314            | V-TDMA     | atomized, dried aerosols                                   | YES                          | NA                         |
| Saleh et al. (2010)              | $1.4^{+0.5}_{-0.5} \times 10^{-5}$ (A)<br>$9.0^{+3.0}_{-3.0} \times 10^{-6}$ (B) | 298                  | 297 – 320            | IVM        | atomized, dried aerosols (a)<br>homogeneous nucleation (b) | YES<br>NO                    | 95% CI                     |
| Bilde et al. (2003)              | $9.4^{+4.7}_{-4.7} \times 10^{-6}$                                               | 298                  | 372 – 401            | FT-TDMA    | atomized, dried aerosols                                   | YES                          | total relative uncertainty |
| Chattopadhyay and Ziemann (2005) | $7.41 \times 10^{-6}$                                                            | 298                  | 298 – 413            | TDPBMS     | atomized, dried aerosols                                   | YES                          | NA                         |
| Bilde et al. (2015)              | $1.7^{+2.7}_{-1.0} \times 10^{-5}$                                               | 298                  | n/a                  | n/a        | n/a                                                        | n/a                          | 95% CI                     |
| Ribeiro da Silva et al. (1999)   | $6.3^{+5.0}_{-5.0} \times 10^{-7}$                                               | 298                  | 367 – 377            | KE         | bulk materials                                             | NO                           | NA                         |
| YataVELLI and Thornton (2010)    | $7.0^{+2.8}_{-2.8} \times 10^{-8}$                                               | 298                  | 308 – 363            | MOVI-CIMS  | homogeneous nucleation                                     | NO                           | $1\sigma$                  |
| Bruns et al. (2012)              | $6.9^{+4.2}_{-4.2} \times 10^{-8}$                                               | 298                  | 337 – 372            | ASAP-MS    | remaining sample after evaporation of solvent              | NO                           | 95% CI                     |
| Cappa et al. (2007)              | $1.0^{+0.6}_{-0.6} \times 10^{-8}$                                               | 298                  | 348 -373             | TPD-PT-RMS | macroscopic, preheated deposit of atomized, dried aerosols | NO                           | $2\sigma$                  |

Note:  $T_{\text{ref}}$  is the reference temperature for the reported  $p_{\text{sat}}$  value;  $T_{\text{exp}}$  is the experimental temperature; CI is confidence interval; NA is for not available; and n/a is not applicable.

**Table S10.** Summary of measurements of saturation of vapor pressure ( $p_{\text{sat}}$ ) of sebacic acid from previous studies.

| <b>Study</b>                     | <b><math>p_{\text{sat, ref}}</math> (Pa)</b> | <b><math>T_{\text{ref}}</math> (K)</b> | <b><math>T_{\text{exp}}</math> (K)</b> | <b>Techniques</b> | <b>Sample</b>                                              | <b>Potential Impact of Solvents</b> | <b>Uncertainty Type</b> |
|----------------------------------|----------------------------------------------|----------------------------------------|----------------------------------------|-------------------|------------------------------------------------------------|-------------------------------------|-------------------------|
| Salo et al. (2010)               | $9.0_{-5.0}^{+5.0} \times 10^{-6}$           | 298                                    | 298 – 573                              | V-TDMA            | atomized, dried aerosols                                   | YES                                 | 95% CI                  |
| Chattopadhyay and Ziemann (2005) | $1.47 \times 10^{-6}$                        | 298                                    | 298 – 413                              | TDPBMS            | atomized, dried aerosols                                   | YES                                 | NA                      |
| Bilde et al. (2015)              | $4.8_{-3.4}^{+11.5} \times 10^{-7}$          | 298                                    | n/a                                    | n/a               | n/a                                                        | n/a                                 | 95% CI                  |
| Bruns et al. (2012)              | $7.8_{-3.2}^{+3.2} \times 10^{-8}$           | 298                                    | 337 – 389                              | ASAP-MS           | remaining sample after evaporation of solvent              | NO                                  | 95% CI                  |
| Davies and Thomas (1960)         | $7.6 \times 10^{-8}$                         | 298                                    | 375 – 403                              | KE                | bulk materials                                             | NO                                  | NA                      |
| Cappa et al. (2007)              | $1.6_{-0.8}^{+0.8} \times 10^{-8}$           | 298                                    | 353 – 385                              | TPD-PT-RMS        | macroscopic, preheated deposit of atomized, dried aerosols | NO                                  | $2\sigma$               |

Note:  $T_{\text{ref}}$  is the reference temperature for the reported  $p_{\text{sat}}$  value;  $T_{\text{exp}}$  is the experimental temperature; CI is confidence interval; NA is for not available; and n/a is not applicable.



**Table S11.** Summary of measurements of saturation of vapor pressure ( $p_{\text{sat}}$ ) of dioctyl sebacate (DOS) from previous studies.

| Study               | $p_{\text{sat, ref}}$ (Pa) | $T_{\text{ref}}$ (K) | $T_{\text{exp}}$ (K) | Techniques | Sample                   | Uncertainty Type |
|---------------------|----------------------------|----------------------|----------------------|------------|--------------------------|------------------|
| Rader et al. (1987) | $2.74 \times 10^{-6}$      | 298                  | 298                  | FT-TDMA    | atomized, dried aerosols | NA               |

Note:  $T_{\text{ref}}$  is the reference temperature for the reported  $p_{\text{sat}}$  value;  $T_{\text{exp}}$  is the experimental temperature; and NA is for not available.

**Table S12.** Summary of measurements of saturation of vapor pressure ( $p_{\text{sat}}$ ) of meso-erythritol and xylitol from previous studies.

| Study                     | $p_{\text{sat, ref}}$ (Pa)                                                                                  | $T_{\text{ref}}$ (K) | $T_{\text{exp}}$ (K) | Techniques | Sample                   | Uncertainty Type |
|---------------------------|-------------------------------------------------------------------------------------------------------------|----------------------|----------------------|------------|--------------------------|------------------|
| meso-erythritol           |                                                                                                             |                      |                      |            |                          |                  |
| Barone et al. (1990)      | $2.5^{+3.1}_{-1.4} \times 10^{-5}$<br>(liquid)                                                              | 298                  | 397 – 428            | TE         | bulk materials           | $2\sigma$        |
| Emanuelsson et al. (2016) | $6.3^{+3.1}_{-3.1} \times 10^{-5}$<br>(liquid)<br>$2.8^{+1.4}_{-1.4} \times 10^{-5}$<br>(crystalline solid) | 298                  | 298, 303, 308        | FT-TDMA    | atomized, dried aerosols | $1\sigma$        |
| xylitol                   |                                                                                                             |                      |                      |            |                          |                  |
| Barone et al. (1990)      | $4.7^{+4.3}_{-2.6} \times 10^{-6}$<br>(liquid)                                                              | 298                  | 406 – 460            | TE         | bulk materials           | $2\sigma$        |

Note:  $T_{\text{ref}}$  is the reference temperature for the reported  $p_{\text{sat}}$  value; and  $T_{\text{exp}}$  is the experimental temperature

**Table S13.** Saturation vapor pressures calculated with COSMO $therm$  using two different conformer sets.

| Groups              | Compounds       | COSMO $base$ <sup>a</sup>      | 0 H-bonds <sup>b</sup>         |
|---------------------|-----------------|--------------------------------|--------------------------------|
| Polyethylene glycol | PEG 6           | $5.42 \times 10^{-10}$         | $9.56 \times 10^{-9}$          |
|                     | PEG 7           | $1.59 \times 10^{-9}$          | $8.83 \times 10^{-8}$          |
|                     | PEG 8           | $3.76 \times 10^{-13}$         | $1.10 \times 10^{-12}$         |
|                     | PEG 9           | $1.72 \times 10^{-15}$         | $4.10 \times 10^{-12}$         |
| Monocarboxylic acid | Palmitic acid   | $(1.14 - 2.06) \times 10^{-5}$ | n/a                            |
|                     | Stearic acid    | $(0.51 - 3.76) \times 10^{-6}$ | n/a                            |
| Dicarboxylic acid   | Azelaic acid    | $(1.36 - 2.29) \times 10^{-6}$ | $(2.44 - 4.10) \times 10^{-6}$ |
|                     | Sebacic acid    | $(1.95 - 4.24) \times 10^{-9}$ | $(0.98 - 2.14) \times 10^{-7}$ |
| Alcohol             | meso-Erythritol | $(0.69 - 1.37) \times 10^{-5}$ | $(1.57 - 3.10) \times 10^{-5}$ |
|                     | Xylitol         | $(2.28 - 3.62) \times 10^{-6}$ | $(3.55 - 5.63) \times 10^{-8}$ |
| Ester               | DEHS            | $9.23 \times 10^{-7}$          | n/a                            |

<sup>a</sup> Conformers from COSMO $base$  (azelaic acid, sebacic acid, palmitic acid, stearic acid, meso-erythritol and xylitol) or computed using the BP-TZVPD-FINE-COSMO+GAS\_18.xml template of COSMO $conf$  (DEHS, PEG6 – 9). <sup>b</sup> Conformers containing no intramolecular H-bonds from systematic conformer sampling described by (Kurtén et al., 2018). Note: n/a is not applicable.

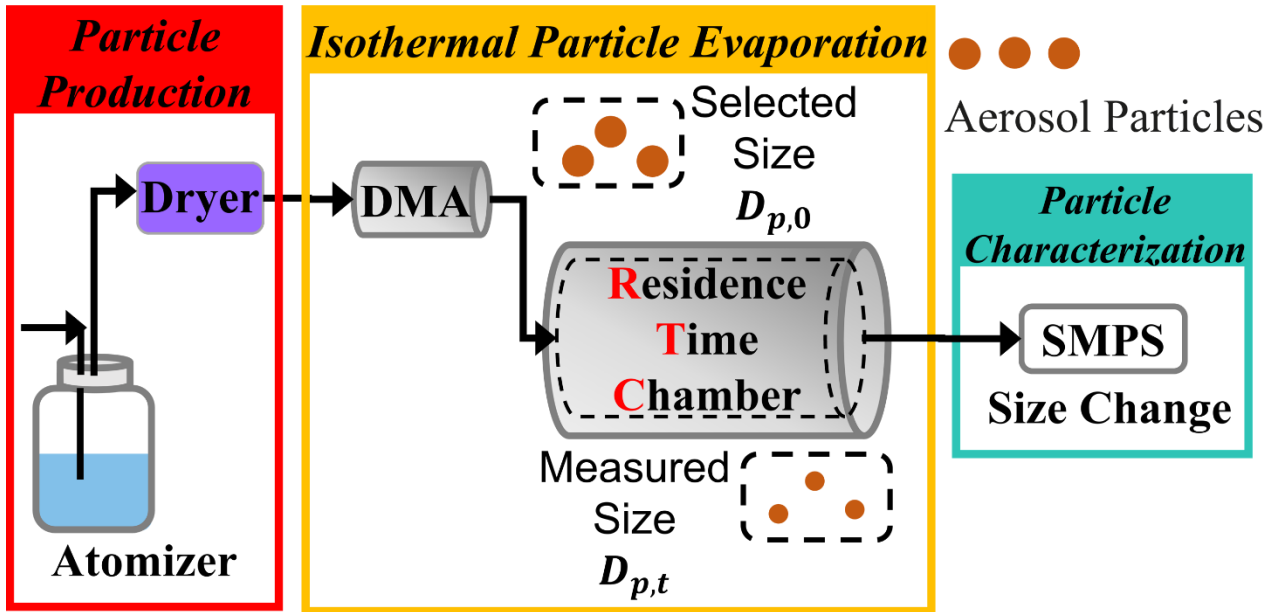

**Figure S1.** Schematic diagram of the measurement setup for isothermal particle evaporation.

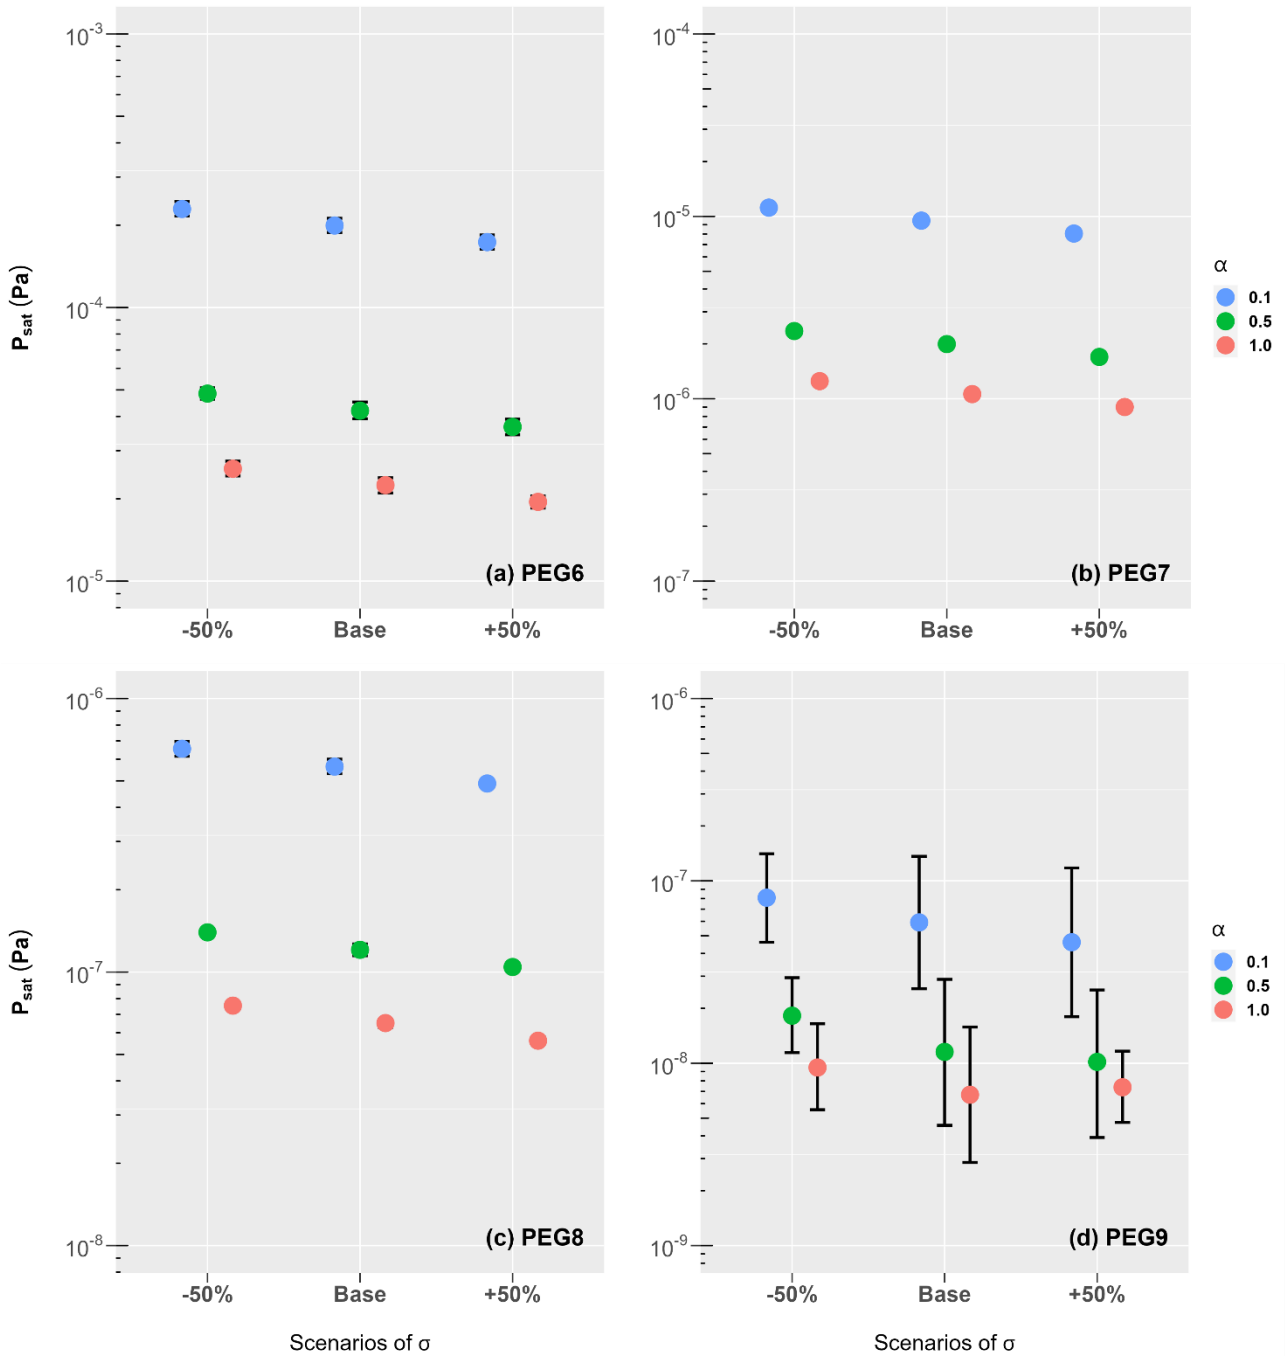

**Figure S2.** Sensitivity analyses with different combinations of accommodation coefficient ( $\alpha$ ) (1.0, red; 0.5, green; 0.1, blue) and surface tension/energy ( $\sigma$ ) (-50%, Base, +50%) for PEGs (PEG 6 – 9). The base case of  $\sigma$  is the reference condition, representing those  $\sigma$  values shown in Table 1 in the main text. The error bars stand for the 95% credible intervals.

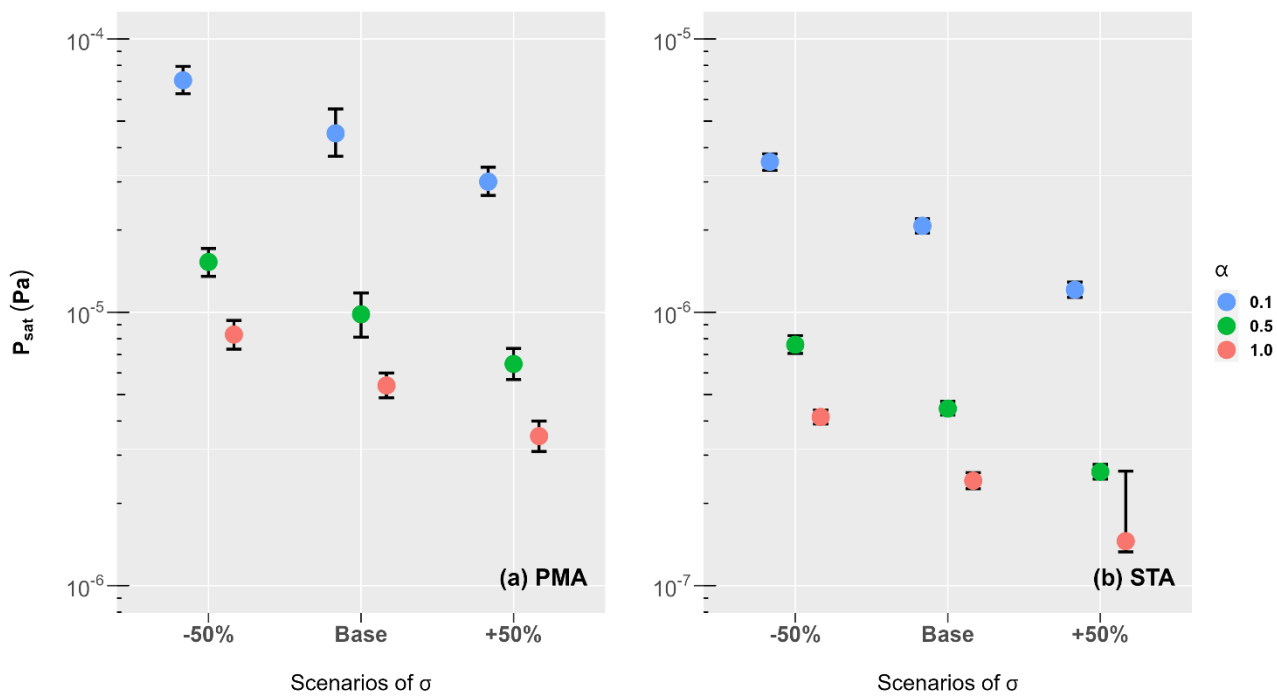

**Figure S3.** Sensitivity analyses with different combinations of accommodation coefficient ( $\alpha$ ) (1.0, red; 0.5, green; 0.1, blue) and surface tension/energy ( $\sigma$ ) (-50%, Base, +50%) for palmitic acid (PMA, a) and stearic acid (STA, b). The base case of  $\sigma$  is the reference condition, representing those  $\sigma$  values shown in Table 1 in the main text. The error bars stand for the 95% credible intervals.

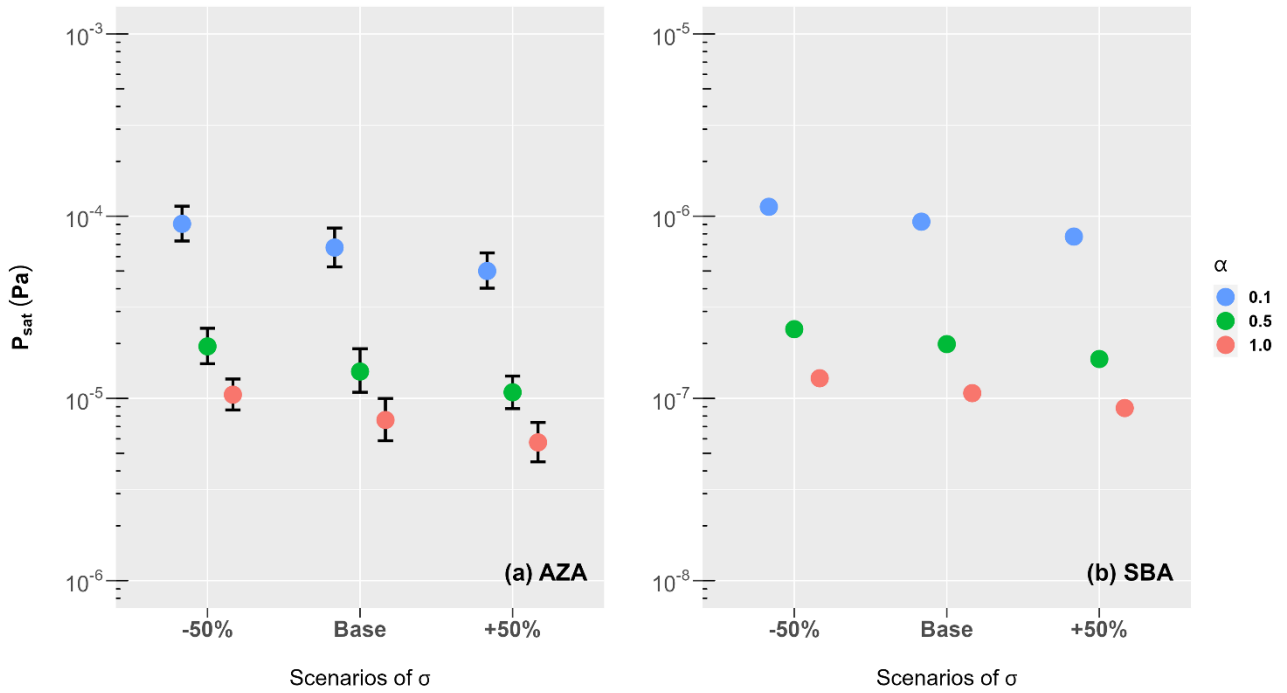

**Figure S4.** Sensitivity analyses with different combinations of accommodation coefficient ( $\alpha$ ) (1.0, red; 0.5, green; 0.1, blue) and surface tension/energy ( $\sigma$ ) (-50%, Base, +50%) for azelaic acid (AZA, a) and sebacic acid (SBA, b). The base case of  $\sigma$  is the reference condition, representing those  $\sigma$  values shown in Table 1 in the main text. The error bars stand for the 95% credible intervals.

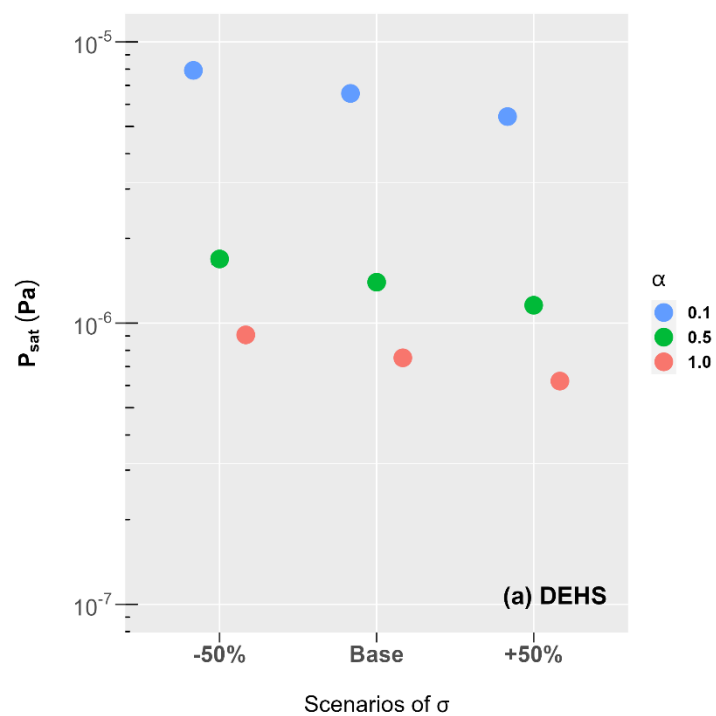

**Figure S5.** Sensitivity analyses with different combinations of accommodation coefficient ( $\alpha$ ) (1.0, red; 0.5, green; 0.1, blue) and surface tension/energy ( $\sigma$ ) (-50%, Base, +50%) for di-2-ethylhexyl sebacate (DEHS). The base case of  $\sigma$  is the reference condition, representing the  $\sigma$  value shown in Table 1 in the main text. The error bars stand for the 95% credible intervals.

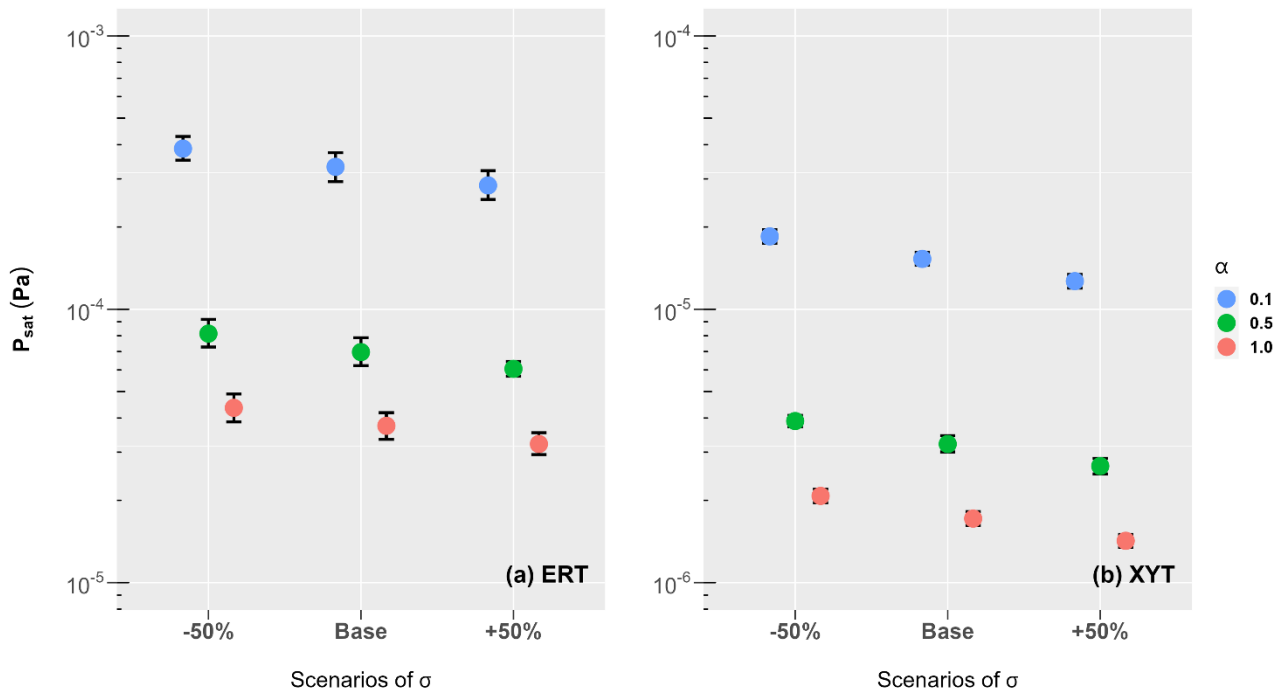

**Figure S6.** Sensitivity analyses with different combinations of accommodation coefficient ( $\alpha$ ) (1.0, red; 0.5, green; 0.1, blue) and surface tension/energy ( $\sigma$ ) (-50%, Base, +50%) for meso-erythritol (ERT, a) and xylitol (XYT, b). The base case of  $\sigma$  is the reference condition, representing those  $\sigma$  values shown in Table 1 in the main text. The error bars stand for the 95% credible intervals.



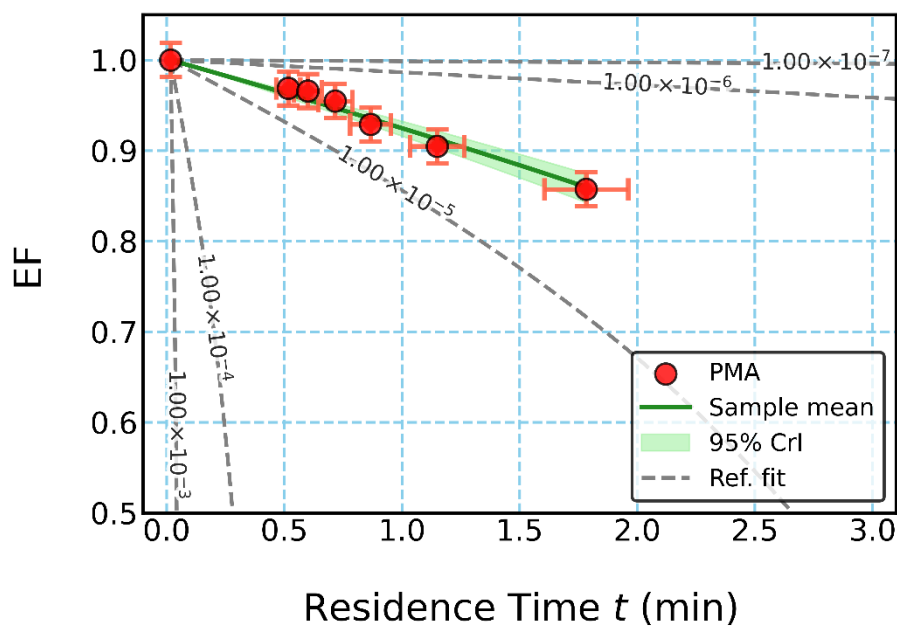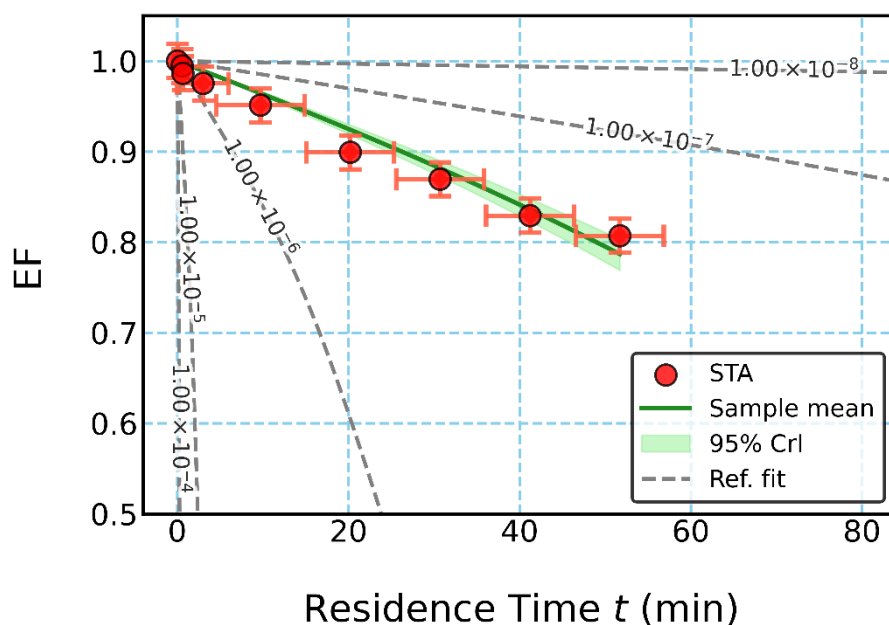

**Figure S7.** Measured evaporation factors (EFs; circles) as a function of residence time for palmitic acid (PMA) and stearic acid (STA), simulations with average optimized  $p_{\text{sat}}$  values (solid lines; green) and 95% credible intervals (95% CrIs; shaded areas in green) with the optimized  $p_{\text{sat}}$  values, and simulated evaporation curves with a set of reference  $p_{\text{sat}}$  values ( $10^{-8}$  to  $10^{-3}$  Pa, with one-decade intervals, dashed grey lines). All the simulated evaporation curves were computed using  $\alpha = 1$  and the chosen  $\sigma$  shown in Table 1 in the main text. For the measured data points of EF, the error bars represent the maximum uncertainty of  $\pm 1.875\%$  in particle size measurements on y-axis and the minimum and maximum residence times on x-axis.

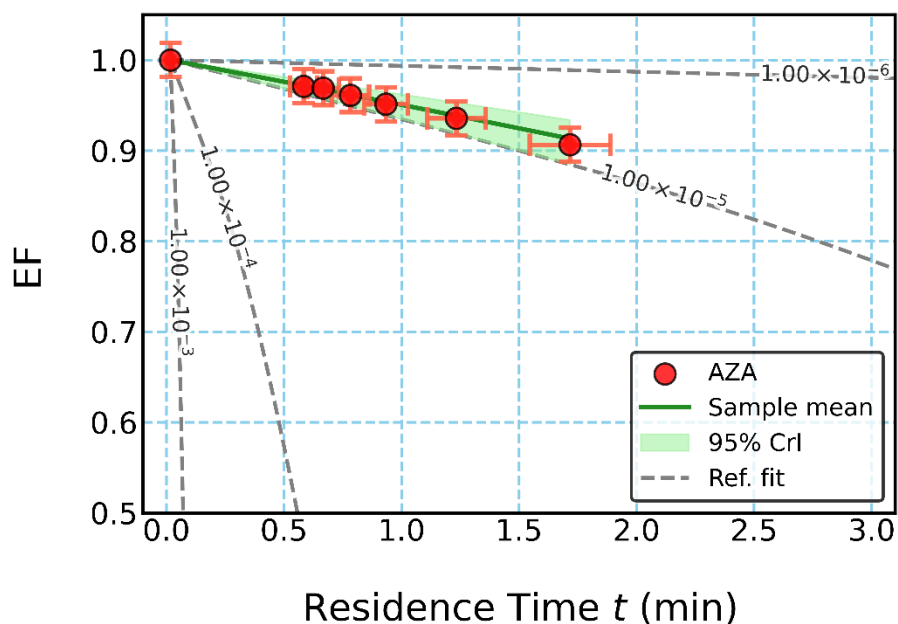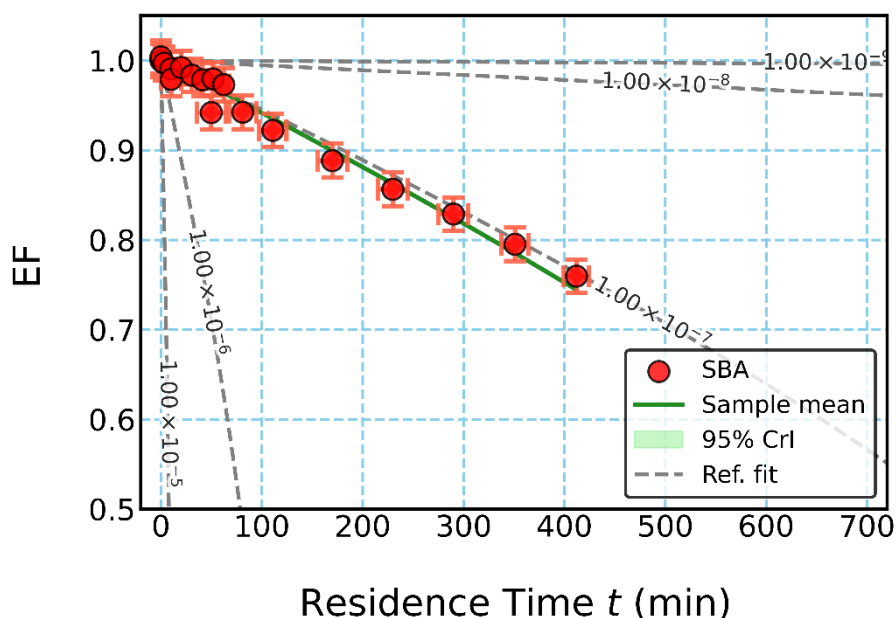

**Figure S8.** Measured evaporation factors (EFs; circles) as a function of residence time for azelaic acid (AZA) and sebacic acid (SBA), simulations with average optimized  $p_{\text{sat}}$  values (solid lines; green) and 95% credible intervals (95% CrIs; shaded areas in green) with the optimized  $p_{\text{sat}}$  values, and simulated evaporation curves with a set of reference  $p_{\text{sat}}$  values ( $10^{-9}$  to  $10^{-3}$  Pa, with one-decade intervals, dashed grey lines). All the simulated evaporation curves were computed using  $\alpha = 1$  and the chosen  $\sigma$  shown in Table 1 in the main text. For the measured data points of EF, the error bars represent the maximum uncertainty of  $\pm 1.875\%$  in particle size measurements on y-axis and the minimum and maximum residence times on x-axis.

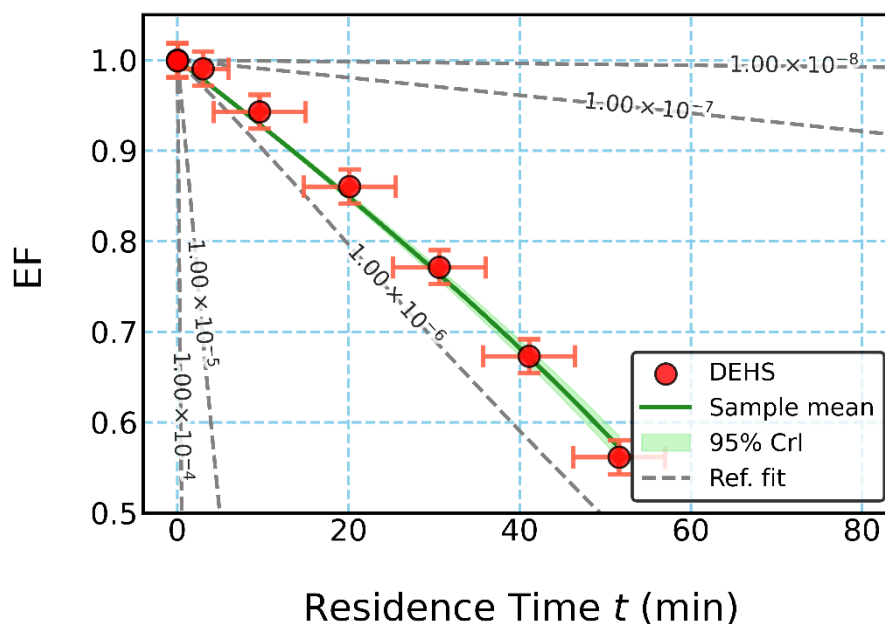

**Figure S9.** Measured evaporation factors (EFs; circles) as a function of residence time for di-2-ethylhexyl sebacate (DEHS), simulations with average optimized  $p_{\text{sat}}$  value (solid line; green) and 95% credible interval (95% CrI; shaded areas in green) with the optimized  $p_{\text{sat}}$  values, and simulated evaporation curves with a set of reference  $p_{\text{sat}}$  values ( $10^{-8}$  to  $10^{-4}$  Pa, with one-decade intervals, dashed grey lines). All the simulated evaporation curves were computed using  $\alpha = 1$  and the chosen  $\sigma$  shown in Table 1 in the main text. For the measured data points of EF, the error bars represent the maximum uncertainty of  $\pm 1.875\%$  in particle size measurements on y-axis and the minimum and maximum residence times on x-axis.

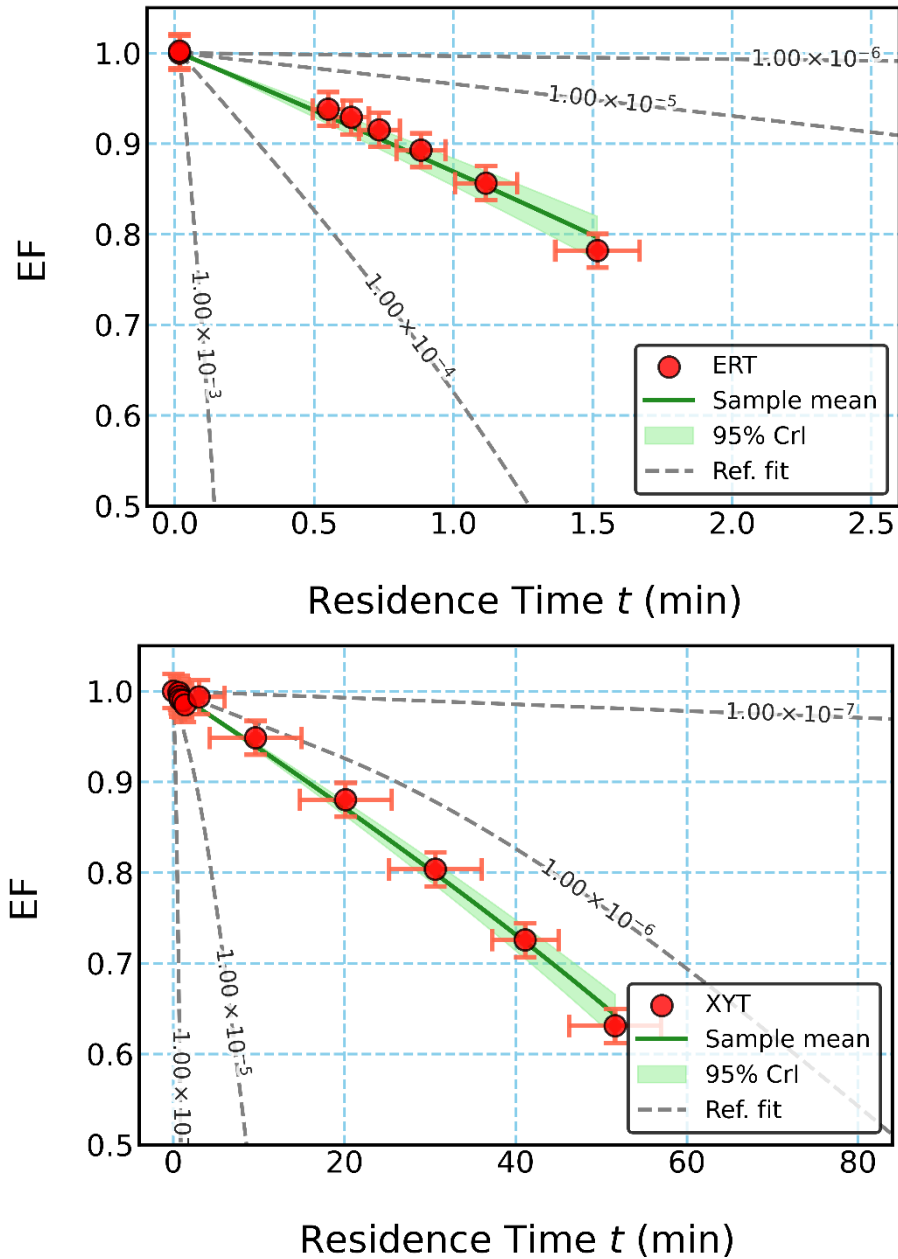

**Figure S10.** Measured evaporation factors (EFs; circles) as a function of residence time for meso-erythritol (ERT) and xylitol (XYT), simulations with average optimized  $p_{\text{sat}}$  values (solid lines; green) and 95% credible intervals (95% CrIs; shaded areas in green) with the optimized  $p_{\text{sat}}$  values, and simulated evaporation curves with a set of reference  $p_{\text{sat}}$  values ( $10^{-7}$  to  $10^{-3}$  Pa, with one-decade intervals, dashed grey lines). All the simulated evaporation curves were computed using  $\alpha = 1$  and the chosen  $\sigma$  shown in Table 1 in the main text. For the measured data points of EF, the error bars represent the maximum uncertainty of  $\pm 1.875\%$  in particle size measurements on y-axis and the minimum and maximum residence times on x-axis.

## References

- Barone, G., Gatta, G. D., Ferro, D., and Piacente, V.: Enthalpies and entropies of sublimation, vaporization and fusion of nine polyhydric alcohols, *Journal of the Chemical Society, Faraday Transactions*, 86, 75-79, 10.1039/ft9908600075, 1990.
- Bilde, M., Svenningsson, B., Mønster, J., and Rosenørn, T.: Even-odd alternation of evaporation rates and vapor pressures of C<sub>3</sub>-C<sub>9</sub> dicarboxylic acid aerosols, *Environmental Science & Technology*, 37, 1371-1378, 10.1021/es0201810, 2003.
- Bilde, M., Barsanti, K., Booth, M., Cappa, C. D., Donahue, N. M., Emanuelsson, E. U., McFiggans, G., Krieger, U. K., Marcolli, C., Topping, D., Ziemann, P., Barley, M., Clegg, S., Dennis-Smith, B., Hallquist, M., Hallquist, A. M., Khlystov, A., Kulmala, M., Mogensen, D., Percival, C. J., Pope, F., Reid, J. P., Ribeiro da Silva, M. A., Rosenørn, T., Salo, K., Soonsin, V. P., Yli-Juuti, T., Prisle, N. L., Pagels, J., Rarey, J., Zardini, A. A., and Riipinen, I.: Saturation vapor pressures and transition enthalpies of low-volatility organic molecules of atmospheric relevance: From dicarboxylic acids to complex mixtures, *Chem Rev*, 115, 4115-4156, 10.1021/cr5005502, 2015.
- Bruns, E. A., Greaves, J., and Finlayson-Pitts, B. J.: Measurement of vapor pressures and heats of sublimation of dicarboxylic acids using atmospheric solids analysis probe mass spectrometry, *J Phys Chem A*, 116, 5900-5909, 10.1021/jp210021f, 2012.
- Cappa, C. D., Lovejoy, E. R., and Ravishankara, A. R.: Determination of evaporation rates and vapor pressures of very low volatility compounds: A study of the C<sub>4</sub>-C<sub>10</sub> and C<sub>12</sub> dicarboxylic acids, *J Phys Chem A*, 111, 3099-3109, 10.1021/jp068686q, 2007.
- Cappa, C. D., Lovejoy, E. R., and Ravishankara, A. R.: Evaporation rates and vapor pressures of the even-numbered C<sub>8</sub>-C<sub>18</sub> monocarboxylic acids, *J Phys Chem A*, 112, 3959-3964, 10.1021/jp710586m, 2008.
- Carpentier, L., Desprez, S., and Descamps, M.: Crystallization and glass properties of pentitols, *Journal of Thermal Analysis and Calorimetry*, 73, 577-586, 10.1023/a:1025482230325, 2003.
- Chattopadhyay, S. and Ziemann, P. J.: Vapor pressures of substituted and unsubstituted monocarboxylic and dicarboxylic acids measured using an improved thermal desorption particle beam mass spectrometry method, *Aerosol Science and Technology*, 39, 1085-1100, 10.1080/02786820500421547, 2005.
- Chen, S.-n., Xia, Q., Li, D., Yuan, W.-G., Zhang, F.-B., and Zhang, G.-L.: Solid-liquid equilibria of nonanedioic acid in binary ethanol + water solvent mixtures from (292.35 to 345.52) K, *Journal of Chemical & Engineering Data*, 54, 1395-1399, 10.1021/je800921n, 2009.
- Cingolani, A. and Berchiesi, G.: Thermodynamic properties of organic compounds, *Journal of thermal analysis*, 6, 87-90, 10.1007/BF01911490, 1974.
- CRC Handbook of Chemistry and Physics: CRC handbook of chemistry and physics, 103rd edition, 2022.
- Davies, M. and Malpass, V. E.: 212. Heats of sublimation of straight-chain monocarboxylic acids, *Journal of the Chemical Society (Resumed)*, 1048-1055, 10.1039/jr9610001048, 1961.
- Davies, M. and Thomas, G. H.: The lattice energies, infra-red spectra, and possible cyclization of some dicarboxylic acids, *Transactions of the Faraday Society*, 56, 185-192, 10.1039/ft9605600185, 1960.
- Domalski, E. S. and Hearing, E. D.: Heat capacities and entropies of organic compounds in the condensed phase. Volume III, *Journal of Physical and Chemical Reference Data*, 25, 1-525, 10.1063/1.555985, 1996.

- Emanuelsson, E. U., Tschiskale, M., and Bilde, M.: Phase state and saturation vapor pressure of submicron particles of meso-erythritol at ambient conditions, *J Phys Chem A*, 120, 7183-7191, 10.1021/acs.jpca.6b04349, 2016.
- Eykman, J. F.: Zur kryoskopischen molekulargewichtsbestimmung, *Zeitschrift für Physikalische Chemie*, 4U, 497-519, 10.1515/zpch-1889-0436, 1889.
- Gallaugh, A. F.: The physical and chemical properties of the polyethylene glycols and their derivatives, 1932.
- Jonsdottir, S. O., Cooke, S. A., and Macedo, E. A.: Modeling and measurements of solid-liquid and vapor-liquid equilibria of polyols and carbohydrates in aqueous solution, *Carbohydr Res*, 337, 1563-1571, 10.1016/s0008-6215(02)00213-6, 2002.
- Khetarpal, S., Lal, K., and Bhatnagar, H. L.: Melt viscosities of succinic, glutaric, adipic, pimelic, suberic, azelaic & sebacic acids, 1980.
- Krieger, U. K., Siegrist, F., Marcolli, C., Emanuelsson, E. U., Gøbel, F. M., Bilde, M., Marsh, A., Reid, J. P., Huisman, A. J., Riipinen, I., Hyttinen, N., Myllys, N., Kurtén, T., Bannan, T., Percival, C. J., and Topping, D.: A reference data set for validating vapor pressure measurement techniques: Homologous series of polyethylene glycols, *Atmospheric Measurement Techniques*, 11, 49-63, 10.5194/amt-11-49-2018, 2018.
- Kurtén, T., Hyttinen, N., D'Ambro, E. L., Thornton, J., and Prisle, N. L.: Estimating the saturation vapor pressures of isoprene oxidation products  $C_5H_{12}O_6$  and  $C_5H_{10}O_6$  using COSMO-RS, *Atmospheric Chemistry and Physics*, 18, 17589-17600, 10.5194/acp-18-17589-2018, 2018.
- Lopes Jesus, A. J., Tome, L. I., Eusebio, M. E., and Redinha, J. S.: Enthalpy of sublimation in the study of the solid state of organic compounds. Application to erythritol and threitol, *J Phys Chem B*, 109, 18055-18060, 10.1021/jp051621n, 2005.
- Misra, A. K., Misra, M., Panpalia, G. M., and Dorle, A. K.: Thermoanalytical and microscopic investigation of interaction between paracetamol and fatty acid crystals, *Journal of Macromolecular Science, Part A*, 44, 685-690, 10.1080/10601320701351177, 2007.
- Oxford, C. R., Rapp, C. M., Wang, Y., Kumar, P., Watson, D., Portelli, J. L., Sussman, E. A., Dhawan, S., Jiang, J., and Williams, B. J.: Development and qualification of a VH-TDMA for the study of pure aerosols, *Aerosol Science and Technology*, 53, 120-132, 10.1080/02786826.2018.1547358, 2019.
- Pacor, P.: Applicability of the du pont 900 dta apparatus in quantitative differential thermal analysis, *Analytica Chimica Acta*, 37, 200-208, 10.1016/s0003-2670(01)80660-7, 1967.
- Rader, D. J., McMurry, P. H., and Smith, S.: Evaporation rates of monodisperse organic aerosols in the 0.02- to 0.2- $\mu$ m-diameter range, *Aerosol Science and Technology*, 6, 247-260, 10.1080/02786828708959137, 1987.
- Ribeiro da Silva, M. A. V., Monte, M. J. S., and Ribeiro, J. R.: Vapour pressures and the enthalpies and entropies of sublimation of five dicarboxylic acids, *The Journal of Chemical Thermodynamics*, 31, 1093-1107, 10.1006/jcht.1999.0522, 1999.
- Roux, M. V., Temprado, M., and Chickos, J. S.: Vaporization, fusion and sublimation enthalpies of the dicarboxylic acids from  $C_4$  to  $C_{14}$  and  $C_{16}$ , *The Journal of Chemical Thermodynamics*, 37, 941-953, 10.1016/j.jct.2004.12.011, 2005.
- Saleh, R., Khlystov, A., and Shihadeh, A.: Effect of aerosol generation method on measured saturation pressure and enthalpy of vaporization for dicarboxylic acid aerosols, *Aerosol Science and Technology*, 44, 302-307, 10.1080/02786821003591810, 2010.

- Salo, K., Jonsson, A. M., Andersson, P. U., and Hallquist, M.: Aerosol volatility and enthalpy of sublimation of carboxylic acids, *J Phys Chem A*, 114, 4586-4594, 10.1021/jp910105h, 2010.
- Singleton, W. S., Ward, T. L., and Dollear, F. G.: Physical properties of fatty acids. I. Some dilatometric and thermal properties of stearic acid in two polymorphic forms, *Journal of the American Oil Chemists Society*, 27, 143-146, 10.1007/bf02634385, 1950.
- Spaght, M. E., Thomas, S. B., and Parks, G. S.: Some heat-capacity data on organic compounds obtained with a radiation calorimeter, *The Journal of Physical Chemistry*, 36, 882-888, 10.1021/j150333a009, 2002.
- Tao, Y. and McMurry, P. H.: Vapor pressures and surface free energies of C<sub>14</sub>-C<sub>18</sub> monocarboxylic acids and C<sub>5</sub> and C<sub>6</sub> dicarboxylic acids, *Environmental Science & Technology*, 23, 1519-1523, 10.1021/es00070a011, 2002.
- Teixeira, A. C., Goncalves da Silva, A. M., and Fernandes, A. C.: Phase behaviour of stearic acid-stearonitrile mixtures. A thermodynamic study in bulk and at the air-water interface, *Chem Phys Lipids*, 144, 160-171, 10.1016/j.chemphyslip.2006.09.001, 2006.
- Thalladi, V. R., Nüsse, M., and Boese, R.: The melting point alternation in  $\alpha$ ,  $\omega$ -alkanedicarboxylic acids, *Journal of the American Chemical Society*, 122, 9227-9236, 10.1021/ja0011459, 2000.
- Tong, B., Tan, Z.-C., Shi, Q., Li, Y.-S., Yue, D.-T., and Wang, S.-X.: Thermodynamic investigation of several natural polyols (I): Heat capacities and thermodynamic properties of xylitol, *Thermochimica Acta*, 457, 20-26, 10.1016/j.tca.2007.02.022, 2007.
- Ventolà, L., Bayés, L., Benages, R., Novegil-Anleo, F. J., Cuevas-Diarte, M. Á., Calvet, T., and Mondieig, D.: Decanedioic acid (C<sub>10</sub>H<sub>18</sub>O<sub>4</sub>)/dodecanedioic acid (C<sub>12</sub>H<sub>22</sub>O<sub>4</sub>) system: Polymorphism of the components and experimental phase diagram, *Helvetica Chimica Acta*, 91, 1286-1298, 10.1002/hlca.200890140, 2008.
- Wynberg, H. and Logothetis, A.: Studies in the synthesis of long-chain compounds<sup>1,2</sup>, *Journal of the American Chemical Society*, 78, 1958-1961, doi.org/10.1021/ja01590a054, 1956.
- Yatavelli, R. L. N. and Thornton, J. A.: Particulate organic matter detection using a micro-orifice volatilization impactor coupled to a chemical ionization mass spectrometer (MOVI-CIMS), *Aerosol Science and Technology*, 44, 61-74, 10.1080/02786820903380233, 2010.
- Yu, S., Meng, S., Tan, Z., Li, L., and Zhang, J.: Heat capacity and thermodynamic properties of stearic acid, *Acta Energetica Solaris Sinica*, 21, 171-175, 2000.
- Zeng, J. L., Cao, Z., Yang, D. W., Xu, F., Sun, L. X., Zhang, L., and Zhang, X. F.: Phase diagram of palmitic acid-tetradecanol mixtures obtained by dsc experiments, *Journal of Thermal Analysis and Calorimetry*, 95, 501-505, 10.1007/s10973-008-9274-x, 2009.
